# Supplementary material for: Using different anthropometric indices to assess prediction ability of type 2 diabetes in elderly population: a 5 year prospective study
Source: PubMed Central journal article supplement (PMC6142386; doi:10.1186/s12877-018-0912-2), 2018-09-17
Supplement: 12877_2018_912_MOESM1_ESM.pdf [file 12877_2018_912_MOESM1_ESM.pdf]

1 **Table S1. Age-adjusted correlation coefficient among anthropometric indices in**  
 2 **men and women**

3

| <b>Variables</b>      | <b>WC</b> | <b>WHtR</b> | <b>BMI</b> | <b>VAI</b> | <b>ABSI</b> | <b>BRI</b> |
|-----------------------|-----------|-------------|------------|------------|-------------|------------|
| <b>Men (n=5998)</b>   |           |             |            |            |             |            |
| WC                    | 1.000     | 0.946*      | 0.772*     | 0.341*     | 0.573*      | 0.941*     |
| WHtR                  |           | 1.000       | 0.789*     | 0.328*     | 0.550*      | 0.997*     |
| BMI                   |           |             | 1.000      | 0.297*     | -0.047*     | 0.786*     |
| VAI                   |           |             |            | 1.000      | 0.152*      | 0.325*     |
| ABSI                  |           |             |            |            | 1.000       | 0.546*     |
| BRI                   |           |             |            |            |             | 1.000      |
| <b>Women (n=3964)</b> |           |             |            |            |             |            |
| WC                    | 1.000     | 0.950*      | 0.717*     | 0.259*     | 0.548*      | 0.945*     |
| WHtR                  |           | 1.000       | 0.729*     | 0.240*     | 0.534*      | 0.996*     |
| BMI                   |           |             | 1.000      | 0.160*     | -0.161*     | 0.721*     |
| VAI                   |           |             |            | 1.000      | 0.165*      | 0.235*     |
| ABSI                  |           |             |            |            | 1.000       | 0.536*     |
| BRI                   |           |             |            |            |             | 1.000      |

4

5 \* $P < 0.001$ .

6  
7  
8  
9

**Table S2. Comparison of AUC among different anthropometric indices in men and women**

| <b>Variables</b>      | <b>WHtR</b> | <b>BMI</b> | <b>VAI</b> | <b>ABSI</b> | <b>BRI</b> |
|-----------------------|-------------|------------|------------|-------------|------------|
| <b>Men (n=5998)</b>   |             |            |            |             |            |
| WC                    | 0.958       | 0.015      | 0.208      | <0.001      | 0.958      |
| WHtR                  |             | 0.009      | 0.220      | <0.001      | 0.387      |
| BMI                   |             |            | 0.010      | <0.001      | 0.009      |
| VAI                   |             |            |            | <0.001      | 0.220      |
| ABSI                  |             |            |            |             | <0.001     |
| <b>Women (n=3964)</b> |             |            |            |             |            |
| WC                    | 0.284       | 0.165      | 0.109      | <0.001      | 0.284      |
| WHtR                  |             | 0.051      | 0.203      | <0.001      | 0.288      |
| BMI                   |             |            | 0.017      | <0.001      | 0.051      |
| VAI                   |             |            |            | <0.001      | 0.203      |
| ABSI                  |             |            |            |             | <0.001     |

26  
27  
28

DeLong *et al*'s non-parametric approach was used to compare the AUCs of different anthropometric indices. The number presented in the table is *P* value.

29  
30  
31  
32  
33  
34  
35  
36  
37  
38  
39  
40  
41  
42  
43  
44  
45  
46  
47  
48  
49  
50  
51  
52  
53  
54  
55

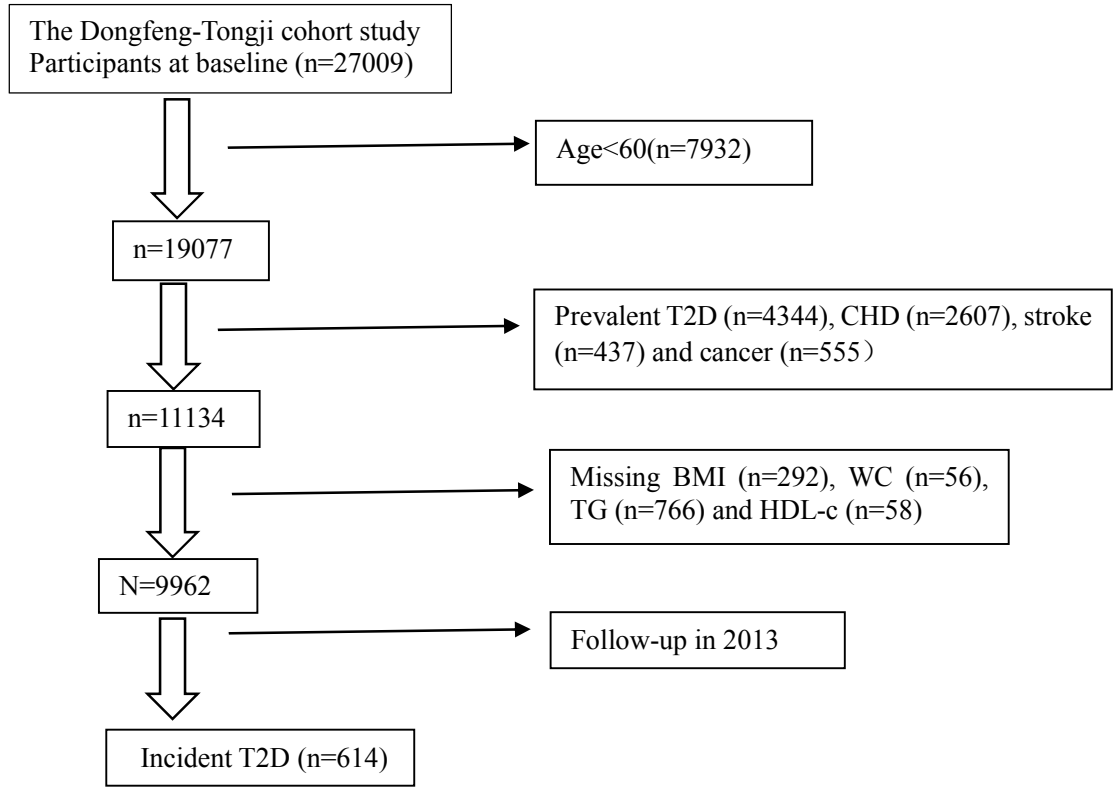

**Figure S1. Flowchart of the participants included in the present analysis**
